# Supplementary material for: Vitamin D Levels in the Pre- and Post-COVID-19 Pandemic Periods and Related Confinement at Pediatric Age
Source: MDPI journal article supplement (doi:10.3390/nu15092089), 2023-04-26
Supplement: s1 [file s1]

# SUPPLEMENTARY TABLES

**Table S1.** Comparison of serum vitamin D status in different age groups in the pre- and post-pandemic period.

|            | Pre-COVID (March 2019- March 2020) |                          |                 |                    |                  | Post-COVID (March 2020- March 2021) |                          |                 |                    |                  |
|------------|------------------------------------|--------------------------|-----------------|--------------------|------------------|-------------------------------------|--------------------------|-----------------|--------------------|------------------|
|            | Total n.                           | Severely deficient n.(%) | Deficient n.(%) | Insufficient n.(%) | Sufficient n.(%) | n.                                  | Severely deficient n.(%) | Deficient n.(%) | Insufficient n.(%) | Sufficient n.(%) |
| <b>Age</b> |                                    |                          |                 |                    |                  |                                     |                          |                 |                    |                  |
| 1-12 m     | 97                                 | 1(1%)                    | 11(11%)         | 19(20%)            | 66(68%)          | 164                                 | 3(2%)                    | 20(12%)         | 31(19%)            | 110(67%)         |
| 1-5 y      | 323                                | 17(5%)                   | 78(24%)         | 116(36%)           | 112(35%)         | 291                                 | 27(9%)                   | 88(30%)         | 81(28%)            | 95(33%)          |
| 6-12 y     | 480                                | 31(6%)                   | 167(35%)        | 170(35%)           | 112(23%)         | 455                                 | 32(7%)                   | 185(41%)        | 147(32%)           | 91(20%)          |
| >12 y      | 152                                | 11(7%)                   | 59(39%)         | 53(35%)            | 29(19%)          | 220                                 | 22(10%)                  | 78(35%)         | 70(32%)            | 50(23%)          |
| TOT        | 1052                               | 60 (6%)                  | 315 (30%)       | 358 (34%)          | 319 (30%)        | 1130                                | 84 (7%)                  | 371 (33%)       | 329 (29%)          | 346 (31%)        |

m, months y, years

Differences were all not statistically significant except for the number of Total subjects with vitamin D Deficient and Severely deficient status in the post-COVID group compared to the pre-COVID group (N= 455 vs 375; p=0.03).

**Table S2** Comparison of the serum Vitamin D status between males and females in the pre-COVID and post-COVID periods.

|         | Pre-COVID (March2019- March 2020) |                          |                 |                    |                  | Post-COVID (March 2020-March 2021) |                          |                 |                    |                  |
|---------|-----------------------------------|--------------------------|-----------------|--------------------|------------------|------------------------------------|--------------------------|-----------------|--------------------|------------------|
|         | Total n.                          | Severely deficient n.(%) | Deficient n.(%) | Insufficient n.(%) | Sufficient n.(%) | Total n.                           | Severely deficient n.(%) | Deficient n.(%) | Insufficient n.(%) | Sufficient n.(%) |
| Males   | 549                               | 28 (5%)                  | 157 (29%)       | 178 (32%)          | 186 (34%)        | 588                                | 49 (8%)                  | 193 (33%)       | 166 (28%)          | 180 (31%)        |
| Females | 503                               | 32 (6%)                  | 158 (30%)       | 180 (34%)          | 133 (26%)        | 542                                | 35 (6%)                  | 178 (33%)       | 163 (30%)          | 166 (31%)        |

There were no statistically significant differences in gender (p = 0.94) distribution between the two periods.

**Table S3.** Comparison of Vitamin D status based on underlying disorders in the pre- and post-pandemic period.

|                               | Pre-COVID (March 2019- March 2020) |                                |                    |                       |                     | Post-COVID (March 2020- March 2021) |                                |                    |                       |                     |
|-------------------------------|------------------------------------|--------------------------------|--------------------|-----------------------|---------------------|-------------------------------------|--------------------------------|--------------------|-----------------------|---------------------|
|                               | Total<br>n.                        | Severely<br>deficient<br>n.(%) | Deficient<br>n.(%) | Insufficient<br>n.(%) | Sufficient<br>n.(%) | Total<br>n.                         | Severely<br>deficient<br>n.(%) | Deficient<br>n.(%) | Insufficient<br>n.(%) | Sufficient<br>n.(%) |
| <b>DIAGNOSIS</b>              |                                    |                                |                    |                       |                     |                                     |                                |                    |                       |                     |
| Endocrinopathy                | 126                                | 8(6%)                          | 25(20%)            | 41(33%)               | 52(41%)             | 160                                 | 12(8%)                         | 50(31%)            | 56(35%)               | 42(26%)             |
| Short Stature                 | 53                                 | 1(2%)                          | 9(17%)             | 29(55%)               | 14(26%)             | 73                                  | 5(7%)                          | 19(26%)            | 23(32%)               | 26(36%)             |
| Hepatopathy                   | 10                                 | 0(0%)                          | 8(80%)             | 2(20%)                | 0(0%)               | 29                                  | 8(28%)                         | 12(41%)            | 9(31%)                | 0(0%)               |
| Nephropathy                   | 48                                 | 2(4%)                          | 14(29%)            | 13(27%)               | 19(40%)             | 81                                  | 6(7%)                          | 20(25%)            | 29(36%)               | 26(32%)             |
| Haematological disorder       | 59                                 | 2(3%)                          | 13(22%)            | 20(34%)               | 24(41%)             | 69                                  | 3(4%)                          | 13(19%)            | 19(28%)               | 34(49%)             |
| Pulmonary disease             | 120                                | 8(7%)                          | 36(30%)            | 49(41%)               | 27(23%)             | 63                                  | 3(5%)                          | 12(19%)            | 19(30%)               | 29(46%)             |
| Obesity                       | 117                                | 9(8%)                          | 60(51%)            | 48(41%)               | 0(0%)               | 63                                  | 4(6%)                          | 33(52%)            | 17(27%)               | 9(14%)              |
| Neurological disorder         | 60                                 | 7(12%)                         | 21(35%)            | 21(35%)               | 11(18%)             | 91                                  | 11(12%)                        | 33(36%)            | 38(42%)               | 9(10%)              |
| Oncological disease           | 118                                | 11(9%)                         | 53(45%)            | 38(32%)               | 16(14%)             | 221                                 | 23(10%)                        | 109(49%)           | 58(26%)               | 31(14%)             |
| Gastroenterological disorders | 25                                 | 2(8%)                          | 9(36%)             | 14(56%)               | 0(0%)               | 66                                  | 7(11%)                         | 34(52%)            | 25(38%)               | 0(0%)               |
| Other                         | 369                                | 11(3%)                         | 76(21%)            | 112(30%)              | 170(46%)            | 287                                 | 7(2%)                          | 55(19%)            | 59(21%)               | 166(58%)            |
| Total                         | 1052                               | 60(6%)                         | 315(30%)           | 358(34%)              | 319(30%)            | 1130                                | 84(7%)                         | 371(33%)           | 329(29%)              | 346(31%)            |

Differences were all not statistically significant except for the subgroup with endocrinopathy (higher risk of *deficiency* or *severe deficiency* in the post-pandemic period;  $p=0.04$ ), and for the subgroup with respiratory problems and with obesity (lower risk of *deficiency* or *severe deficiency* in the post-pandemic period;  $p=0.01$  and  $p<0.01$ , respectively).
